# Supplementary material for: Stabilization and Valorization of Beer Bagasse to Obtain Bioplastics
Source: MDPI journal article supplement (doi:10.3390/polym15081877), 2023-04-14
Supplement: s1 [file s1]

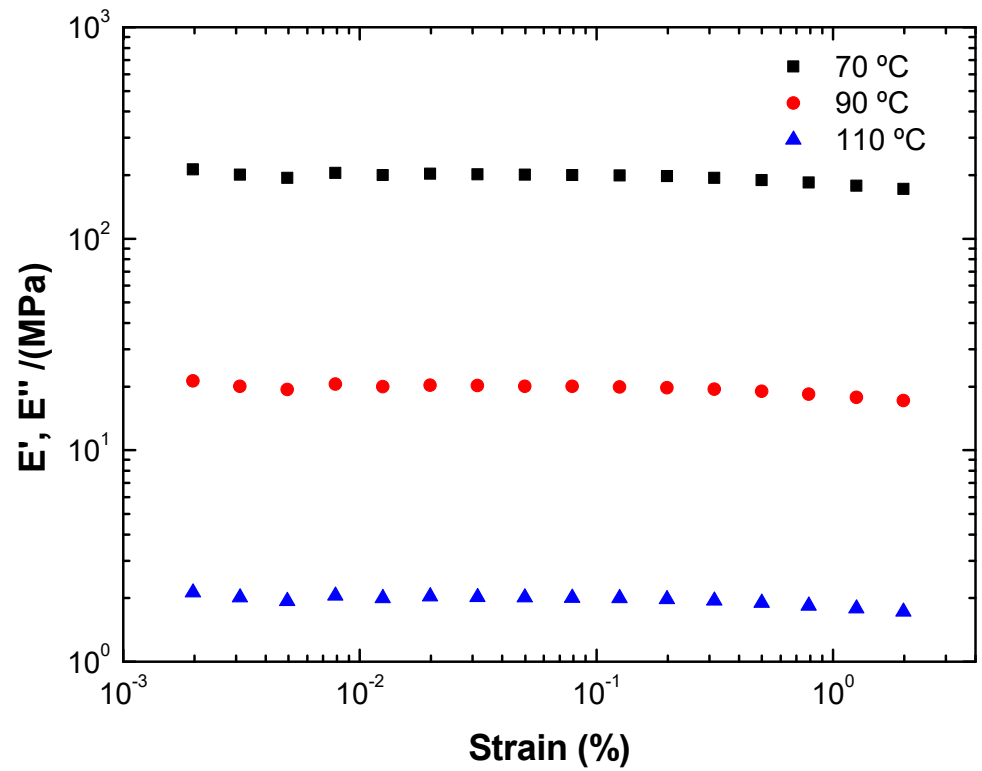

**Figure S1.** Strain sweep tests of bioplastics processed at different mold temperature.

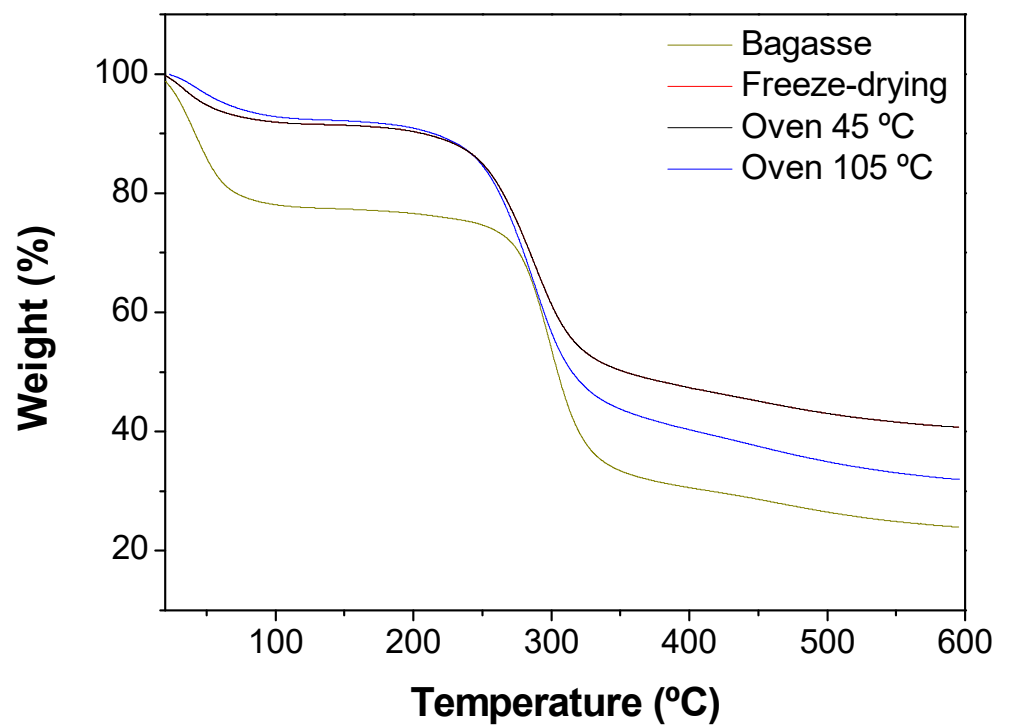

**Figure S2.** Thermogravimetric (TGA) profiles of raw bagasse and bagasse stabilized by freeze-drying and thermal treatment at 45 and 105 °C.

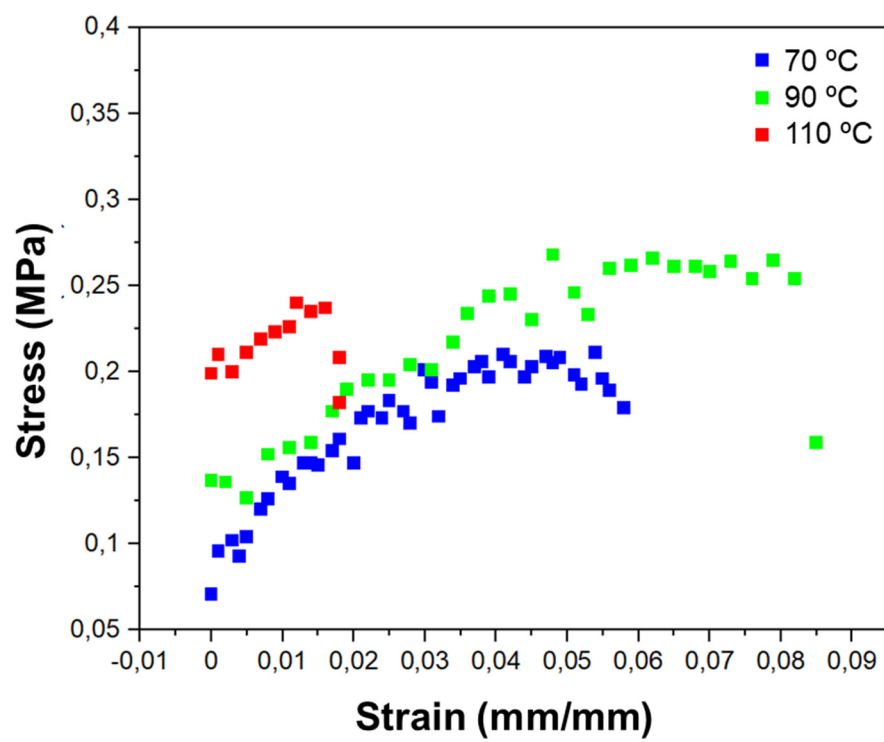

**Figure S3.** Stress-strain profiles of bioplastics processed at different mold temperature.
